# Supplementary material
Source: Research Square preprint supplement (doi:10.21203/rs.3.rs-9878895/v1)
Supplement: Supplementary file 1 [file 1fa6c0d5feea855fc3e05003.docx]

**Supplementary Materials and Methods**

**S1. Detailed Sample Processing Protocol**

**S1.1 FFPE Section Preparation**
Tumor tissue blocks were reviewed by board-certified pathologists to confirm diagnosis and assess tumor content. Hematoxylin-eosin (H&E)-stained slides were prepared from each block to estimate tumor cellularity. Areas with ≥30% tumor cell content were marked. When tumor content was <30%, macrodissection was performed by scraping marked tumor areas from 3-5 adjacent unstained sections (5-10 μm thickness) to enrich for tumor cells.

**S1.2 DNA Extraction and Quality Control**
Genomic DNA was extracted using the ReliaPrep™ FFPE gDNA Miniprep System and ReliaPrep™ FFPE Total RNA Miniprep System (Promega, Madison, WI, USA) according to manufacturer's instructions. Briefly, FFPE sections were deparaffinized with mineral oil, followed by protein digestion using proteinase K at 56°C for 3 hours. DNA was isolated using spin columns and eluted in 60 μL elution buffer.

DNA quantity was measured using the Qubit dsDNA HS Assay Kit on a Qubit 4 Fluorometer (Thermo Fisher Scientific). DNA quality was assessed by determining the DV200 metric (percentage of DNA fragments >200 base pairs) using the Agilent 2200 TapeStation system with Genomic DNA ScreenTape (Agilent Technologies, Santa Clara, CA, USA). Samples with ≥20 ng total DNA and DV200 ≥30% were considered suitable for library preparation. Samples failing quality metrics were re-extracted from additional sections or excluded from analysis.

**S2. Detailed Next-Generation Sequencing Protocol**

**S2.1 Library Preparation**
Sequencing libraries were prepared from 20 ng tumor DNA using the Ion AmpliSeq Library Kit Plus (Thermo Fisher Scientific, catalog #4488990) following manufacturer's protocol version 2.0. The Oncomine Comprehensive Assay v4 (OCA v4) primer pool covering 517 genes was used for multiplex PCR amplification (catalog #A43931). Amplification consisted of:

- Initial denaturation: 99°C for 2 minutes
- 21 cycles of: 99°C for 15 seconds, 60°C for 16 minutes

Amplicons were treated with FuPa reagent to partially digest primers and phosphorylate amplicons. Adapters containing Ion Xpress Barcodes were ligated to enable sample multiplexing. Libraries were purified using Agencourt AMPure XP beads (Beckman Coulter, Indianapolis, IN, USA) at 1.2× bead:sample ratio.

Library quality and concentration were assessed using the Ion Library TaqMan Quantitation Kit (Thermo Fisher Scientific) on a QuantStudio 5 Real-Time PCR System. Libraries were normalized to 100 pM before templating.

**S2.2 Template Preparation and Sequencing**
Template preparation and chip loading were automated on the Ion Chef System (Thermo Fisher Scientific) using the Ion 540 Kit-Chef (catalog #A34538). Eight barcoded libraries were pooled per Ion 540 Chip. The Ion Chef performed:

- Emulsion PCR to clonally amplify DNA libraries on Ion Sphere Particles (ISPs)
- Enrichment of template-positive ISPs
- Loading of enriched ISPs onto Ion 540 Chips

Sequencing was performed on the Ion GeneStudio S5 XL System (Thermo Fisher Scientific) using Ion 540 Chips. Sequencing run parameters were set to 850 flows targeting read lengths up to 200 base pairs. Target performance metrics included:

- Average coverage depth: ≥1000× (range: 500-3000×)
- Coverage uniformity: ≥90% (percentage of amplicons covered at ≥0.2× mean depth)
- On-target reads: ≥85%
- Usable reads: ≥80%
- Polyclonal reads: <30%

**S3. Detailed Bioinformatic Analysis Pipeline**

**S3.1 Signal Processing and Base Calling**
Raw voltage signals were converted to sequence data using Torrent Suite Software v5.18.1 (Thermo Fisher Scientific). The software performed:

- Phase correction to account for signal decay
- Background subtraction
- Normalization across chip regions
- Base calling using flow-space algorithms
- Quality score assignment

**S3.2 Alignment and Variant Calling**
Base-called sequences were aligned to the human reference genome (hg19/GRCh37) using TMAP (Torrent Mapping Alignment Program) with default parameters optimized for amplicon sequencing. Variant calling and annotation were performed using Ion Reporter Software v5.20.8.0 with the Oncomine Comprehensive v4 workflow (tumor-only analysis mode).

Variant calling thresholds:

- Single nucleotide variants (SNVs): ≥5% variant allele frequency (VAF), ≥10 variant reads, Phred quality score ≥20
- Insertions/deletions (indels): ≥5% VAF, ≥10 variant reads
- Copy number variations (CNVs): ≥4 copies for amplifications, <1.5 copies for deletions, calculated using normalized coverage ratios
- Gene fusions: ≥20 fusion reads spanning predicted breakpoint, ≥2 unique start sites

**S3.3 Variant Filtering**
Variants were filtered to remove:

- Common germline polymorphisms (>1% allele frequency in gnomAD population database)
- Strand-bias artifacts (Fisher Strand Score >80)
- Low-quality variants (Phred quality <20)
- Known sequencing artifacts in homopolymer regions

Hotspot variants in oncogenes were retained at lower VAF thresholds (≥3%) if recurrently reported in COSMIC database.

**S4. Tumor Mutational Burden (TMB) Calculation**

TMB was calculated as the number of somatic non-synonymous mutations per megabase (mut/Mb) of coding sequence examined. The calculation included:

- Single nucleotide variants (SNVs): missense, nonsense, splice site
- Small insertions and deletions (indels) causing frameshift or in-frame changes
- Excluded: Synonymous variants, variants in non-coding regions, known germline variants, recurrent sequencing artifacts

TMB = (Total somatic mutations) / (Coding region size in Mb)

Coding region size: 1.7 Mb (OCA v4 panel)

TMB-high threshold: ≥10 mut/Mb, based on published data correlating with immunotherapy response across tumor types.

**S5. Homologous Recombination Deficiency (HRD) Assessment**

**S5.1 Genomic Instability Metric (GIM) Calculation**
HRD was assessed using a Genomic Instability Metric (GIM) derived from three components:

1. Loss of Heterozygosity (LOH) score: Number of LOH events ≥15 Mb in size
2. Telomeric Allelic Imbalance (TAI) score: Number of regions with allelic imbalance extending to telomeres
3. Large-scale State Transitions (LST) score: Number of chromosomal breaks between adjacent regions ≥10 Mb

GIM = LOH score + TAI score + LST score

HRD-positive threshold: GIM ≥16

**S5.2 Validation Against MyChoice® CDx**
The GIM scoring algorithm was validated using published concordance data with MyChoice® CDx (Myriad Genetics), the FDA-approved companion diagnostic for HRD assessment. Concordance rate: 92% (16).

**S6. Microsatellite Instability (MSI) Analysis**

MSI status was determined using 76 microsatellite markers distributed across the genome, including:

**Mononucleotide markers (primary panel):**

- BAT25, BAT26, CAT25, MON27, NR21, NR22, NR24, NR27

**Dinucleotide and other repeat markers:**

- Additional 68 markers covering chromosomes 1-22, X

For each marker, the number of repeat units in tumor DNA was compared to expected germline lengths. Markers were scored as unstable if insertions/deletions were detected.

**MSI classification:**

- MSI-High (MSI-H): ≥19 unstable markers (≥25% of markers tested)
- MSS (Microsatellite Stable): <19 unstable markers

**S7. Pharmacogenomic Variant Interpretation**

Germline pharmacogenomic variants were identified in genes affecting drug metabolism:

**S7.1 Genes Analyzed**

- *DPYD* (dihydropyrimidine dehydrogenase): 5-fluorouracil metabolism
- *CYP2D6* (cytochrome P450 2D6): tamoxifen, opioid metabolism
- *UGT1A1* (UDP glucuronosyltransferase 1A1): irinotecan metabolism
- *TPMT* (thiopurine S-methyltransferase): 6-mercaptopurine, azathioprine metabolism

**S7.2 Germline Variant Identification**
Variants with VAF patterns consistent with germline origin were flagged:

- Heterozygous: VAF 40-60%
- Homozygous: VAF >90%

**S7.3 Phenotype Prediction**
Predicted metabolizer phenotypes based on CPIC guidelines:

- Normal metabolizer (NM): Wild-type or normal function alleles
- Intermediate metabolizer (IM): One decreased/no function allele
- Poor metabolizer (PM): Two decreased/no function alleles
- Ultrarapid metabolizer (UM): Gene duplication/multiplication (CYP2D6 only)

**S7.4 Clinical Recommendations**
Dosing recommendations provided according to CPIC guidelines for each metabolizer phenotype.

**S8. Germline-Suspected Variant Identification**

Variants flagged for potential germline origin in hereditary cancer predisposition genes were identified using a multi-parameter algorithm:

**S8.1 VAF-Based Criteria**

- Heterozygous pattern: VAF 40-60%
- Homozygous pattern: VAF >90%
- Located in regions with copy-neutral LOH: VAF >70%

**S8.2 Gene-Based Criteria**
Variants in 59 established hereditary cancer predisposition genes including:

- DNA repair: *BRCA1*, *BRCA2*, *PALB2*, *ATM*, *CHEK2*, *RAD51C*, *RAD51D*
- Mismatch repair: *MLH1*, *MSH2*, *MSH6*, *PMS2*, *EPCAM*
- Tumor suppressors: *TP53*, *PTEN*, *STK11*, *CDH1*, *APC*, *VHL*
- Others: *CDKN2A*, *RET*, *MET*, *BRIP1*, *NBN*

**S8.3 Pathogenicity Criteria**

- ClinVar classification: Pathogenic or Likely Pathogenic
- ACMG/AMP criteria: Evidence codes supporting pathogenicity (PVS1, PS1-4, PM1-6, PP1-5)

**S8.4 Reporting and Follow-Up**
Patients with germline-suspected pathogenic variants were flagged for:

1. Confirmatory germline testing from blood or saliva
2. Genetic counseling referral
3. Family cascade testing recommendation
4. Risk-reduction and surveillance recommendations per NCCN guidelines

**S9. Quality Control Metrics and Troubleshooting**

**S9.1 Sample-Level QC Thresholds**

| **Metric** | **Pass Threshold** | **Action if Failed** |
| --- | --- | --- |
| Tumor content | ≥30% | Macrodissection or exclusion |
| DNA input | ≥20 ng | Re-extraction from additional sections |
| DV200 | ≥30% | Re-extraction or sample exclusion |
| On-target reads | ≥85% | Repeat library preparation |
| Mean depth | ≥1000× | Repeat sequencing |
| Coverage uniformity | ≥90% | Repeat sequencing |
| Usable reads | ≥80% | Repeat library preparation |

**S9.2 Failed Sample Management**
Samples failing QC at any stage were:

1. Re-tested once using additional tissue sections
2. Excluded from analysis if repeat testing failed
3. Documented with specific failure reason

Of 114 enrolled patients, 3 were excluded: 2 for sequencing QC failure, 1 for insufficient tumor content.

**S10. Software and Database Versions**

**S10.1 Analysis Software**

- Torrent Suite Software: v5.18.1
- Ion Reporter Software: v5.20.8.0
- TMAP aligner: v5.12.3
- Variant Caller: v5.18

**S10.2 Annotation Databases (versions at time of analysis)**

- ClinVar: September 2024 release
- COSMIC: v99
- OncoKB: v4.8 (October 2024)
- CIViC: October 2024 release
- dbSNP: build 156
- gnomAD: v2.1.1
- CPIC: Guidelines current as of October 2024

**S10.3 Statistical Software**

- R: version 4.4.2 (R Foundation for Statistical Computing, Vienna, Austria)
- Python: version 3.11.5
- R packages: tidyverse (v2.0.0), ggplot2 (v3.4.4), ComplexHeatmap (v2.16.0)
- Python packages: scipy (v1.11.3), statsmodels (v0.14.0), pandas (v2.1.1)

**S11. Data Availability**

Processed variant call files and clinical annotations are available upon reasonable request to the corresponding author, subject to institutional review board approval and data use agreement to protect patient confidentiality.
